# Supplementary material for: A novel concentrated growth factor (CGF) and bio-oss based strategy for second molar protection after impacted mandibular third molar extraction: a randomized controlled clinical study
Source: BMC Oral Health. 2023 Oct 12;23:750. doi: 10.1186/s12903-023-03411-2 (PMC10571244; doi:10.1186/s12903-023-03411-2)
Supplement: Supplementary file 2 — Supplementary Material 2 [file 12903_2023_3411_MOESM2_ESM.xlsx]

## Sheet: Sheet1
Supplementary Table 2. Baseline values before tooth extraction measured by CBCT in three groups
Baseline values	Control (n=22)	Test A (n=23)	Test B (n=21)
	Mean±SD (mm)	Mean±SD (mm)	Mean±SD (mm)
CD	10.68±2.05	11.02±1.91	10.15±1.06
AB	5.33±1.81	4.14±1.74	4.88±1.27
BC	5.86±1.43	6.82±1.71	6.06±1.09
AB/AC	0.47±0.11	0.37±0.14	0.44±0.09
